# Supplementary material for: Achieving ultrasensitive temperature sensing through non-thermally coupled energy levels to overcome energy gap constraints
Source: Royal Society of Chemistry journal article supplement (doi:10.1039/d3qi02625f), 2024-01-01
Supplement: d3qi02625f1.pdf [file d3qi02625f1.pdf]

## Supporting Information

### **Achieving ultrasensitive temperature sensing through non-thermally coupled energy levels to overcome energy gap constraint**

Guotao Xiang<sup>1,\*</sup>, Yuanyuan Yi<sup>1</sup>, Zhiyu Yang<sup>1</sup>, Yongjie Wang<sup>1</sup>, Lu Yao<sup>1</sup>, Sha Jiang<sup>1</sup>, Xianju Zhou<sup>1</sup>, Li Li<sup>1</sup>, Xiaojun Wang<sup>3,\*</sup> and Jiahua Zhang<sup>2,\*</sup>

<sup>1</sup> *Department of Mathematics and Physics, Chongqing University of Posts and Telecommunications, 2 Chongwen Road, Chongqing 400065, China*

<sup>2</sup> *State Key Laboratory of Luminescence and Applications, Changchun Institute of Optics, Fine Mechanics and Physics, Chinese Academy of Sciences, 3888 Eastern South Lake Road, Changchun 130033, China*

<sup>3</sup> *Department of Physics & Astronomy, Georgia Southern University, Statesboro, Georgia 30460, U.S.A.*

*Corresponding Authors:* Dr. Guotao Xiang; *Email address:* [xianggt@cqupt.edu.cn](mailto:xianggt@cqupt.edu.cn)

Dr. Jiahua Zhang; *Email address:* [zhangjh@ciomp.ac.cn](mailto:zhangjh@ciomp.ac.cn)

Dr. Xiaojun Wang; *Email address:* [xwang@georgiasouthern.edu](mailto:xwang@georgiasouthern.edu)

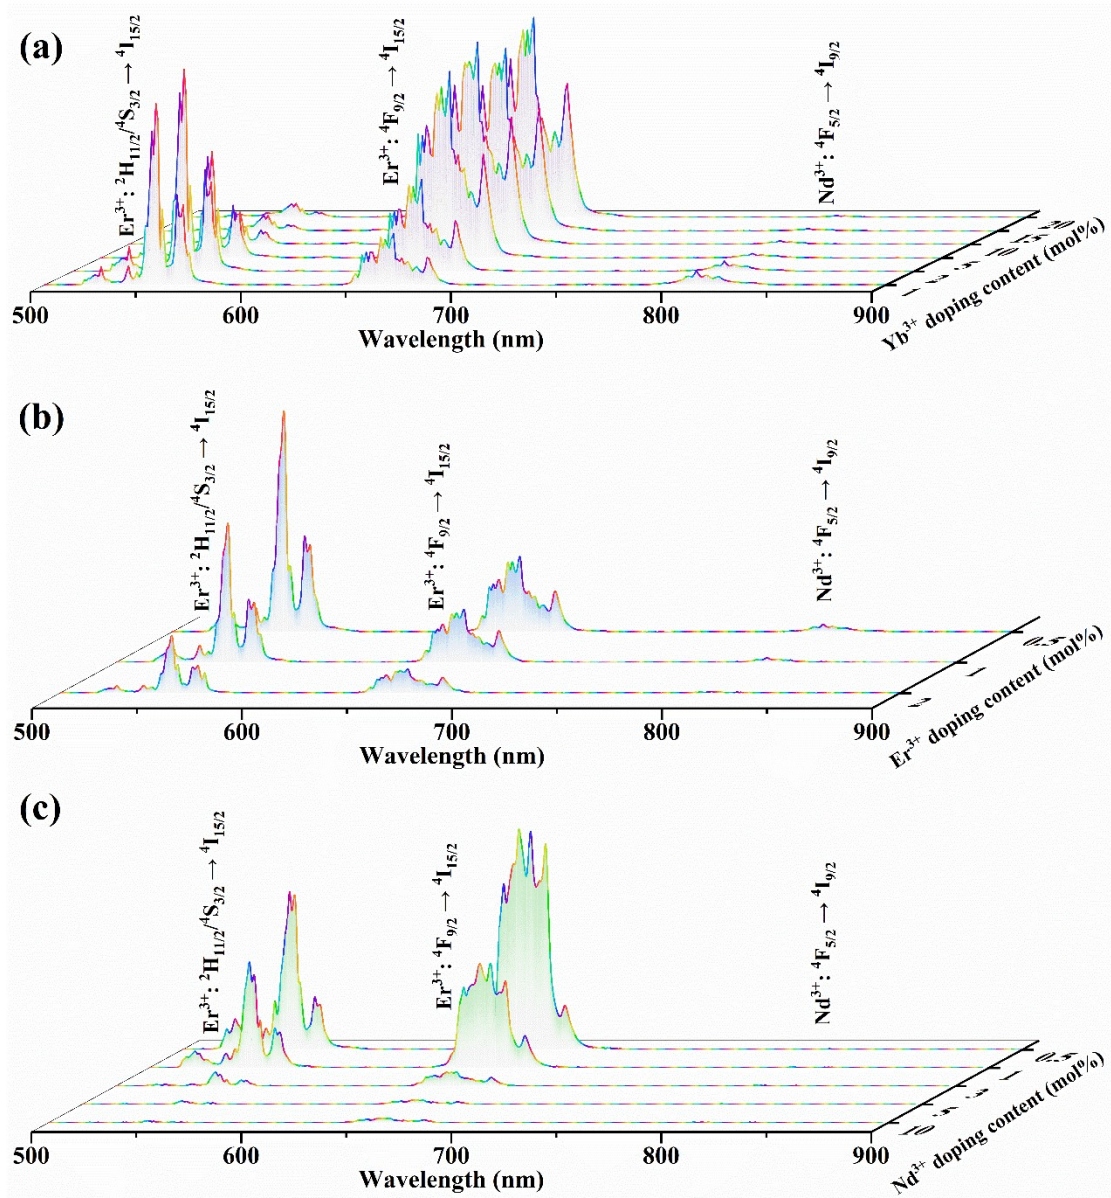

**Figure S1** PL spectra of (a)  $\text{CaSc}_2\text{O}_4$ :  $x\%$   $\text{Yb}^{3+}/0.5\%$   $\text{Er}^{3+}/3\%$   $\text{Nd}^{3+}$  ( $x = 1, 2, 5, 10, 15, 20$ ), (b)  $\text{CaSc}_2\text{O}_4$ :  $2\%$   $\text{Yb}^{3+}/y\%$   $\text{Er}^{3+}/3\%$   $\text{Nd}^{3+}$  ( $y = 0.5, 1, 2$ ) and (c)  $\text{CaSc}_2\text{O}_4$ :  $5\%$   $\text{Yb}^{3+}/0.5\%$   $\text{Er}^{3+}/z\%$   $\text{Nd}^{3+}$  ( $z = 0.5, 1, 3, 5, 10$ ) under the excitation of 980 nm wavelength.

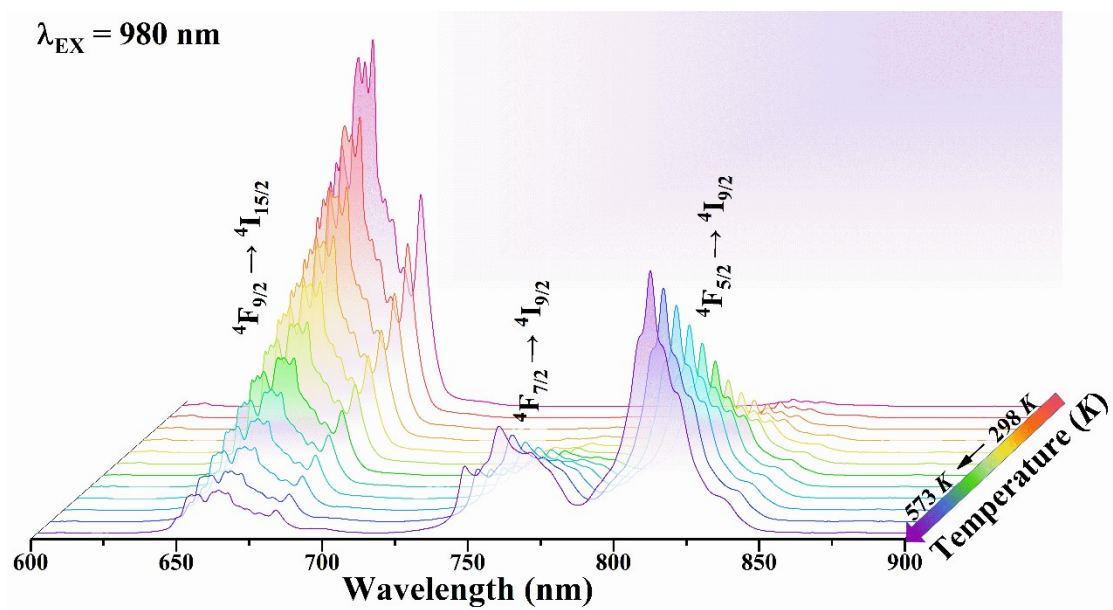

Figure S2 Temperature dependent red and NIR emission in CSO excited by 980 nm wavelength.

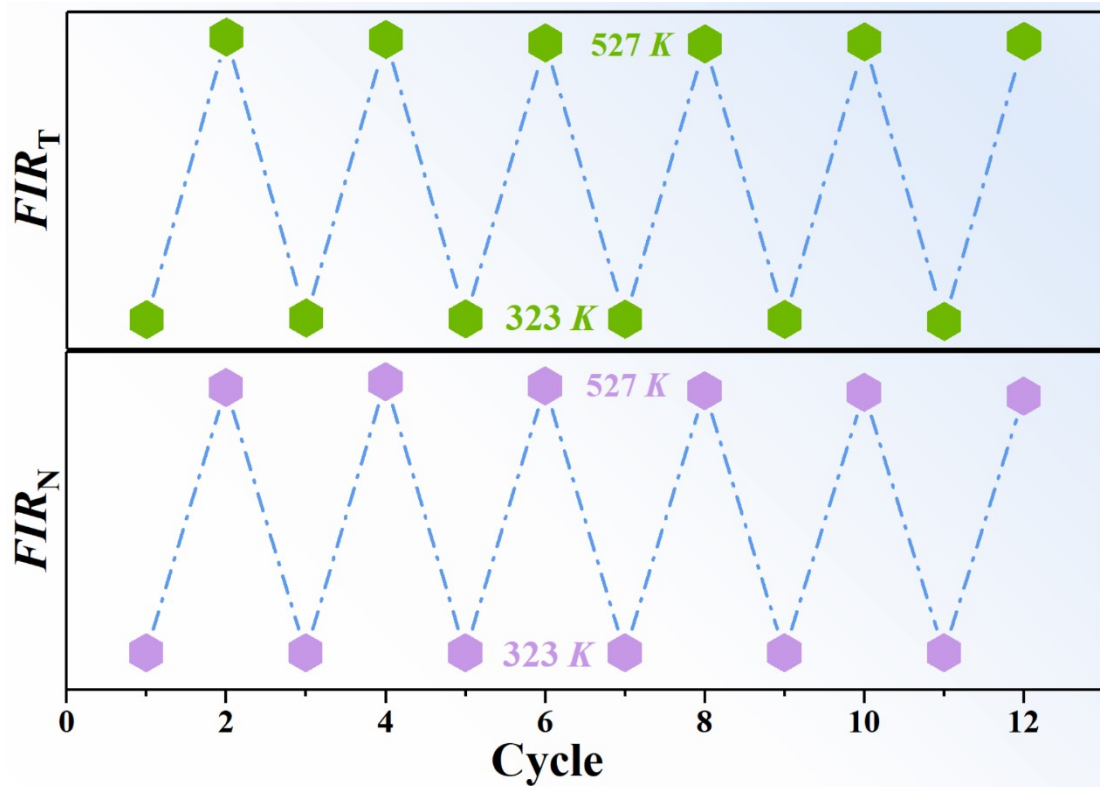

Figure S3 The repeatability of  $FIR_T$ - and  $FIR_N$ -based optical thermometer.
